# Supplementary material for: Evaluation of the Biodistribution of Serinolamide-Derivatized C60 Fullerene
Source: PubMed Central journal article supplement (PMC7023239; doi:10.3390/nano10010143), 2020-01-13
Supplement: nanomaterials-10-00143-s001.pdf [file nanomaterials-10-00143-s001.pdf]

## SUPPLEMENTARY MATERIALS

### Evaluation of the Biodistribution of Serinolamide-Derivatized C<sub>60</sub> Fullerene

Nicholas G. Zaibaq<sup>1†</sup>, Alyssa C. Pollard<sup>1,2†</sup>, Michael J. Collins<sup>1,3</sup>, Federica Pisaneschi<sup>2</sup>, Mark D. Pagel<sup>2\*</sup>, and Lon J. Wilson<sup>1\*</sup>

<sup>1</sup>Department of Chemistry and Smalley-Curl Institute, Rice University, 6100 Main St, Houston, TX 77005

<sup>2</sup>Department of Cancer Systems Imaging, MD Anderson Cancer Center, 1881 East Rd, Houston, TX 77054

<sup>3</sup>Present Address: Department of Chemistry, University of Pittsburgh, 3960 Forbes Ave, Pittsburgh, PA 15260

\*Co-corresponding authors.

†These authors contributed equally.

## 1. Analytical spectra for synthesis of C<sub>60</sub>-NOTA conjugate

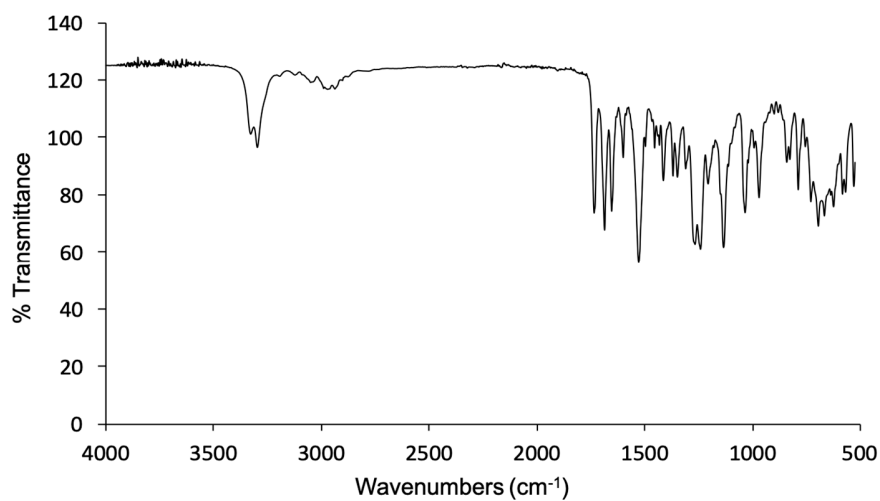

Figure S1. IR of compound 1.

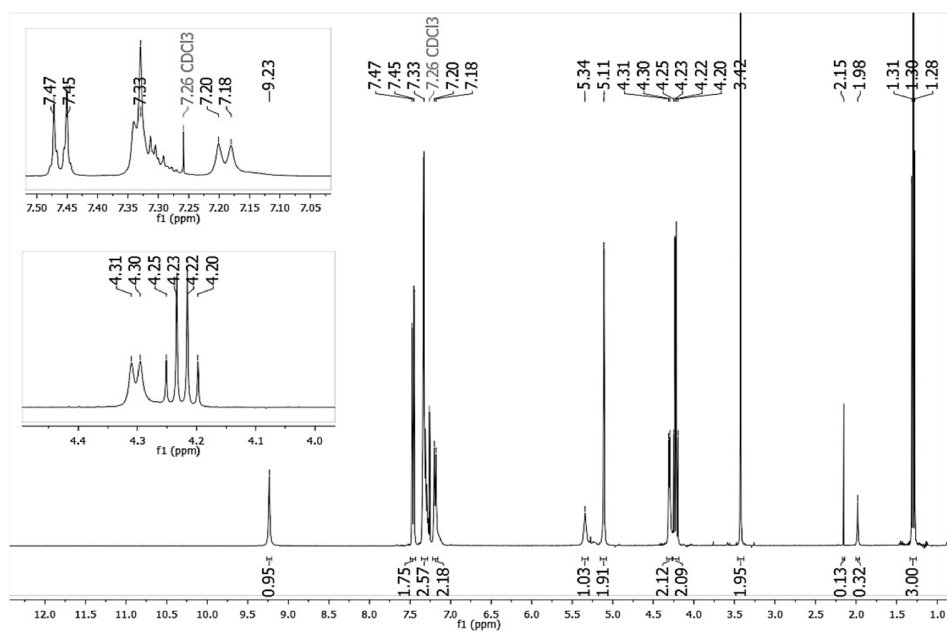

Figure S2. <sup>1</sup>H NMR of compound 1.

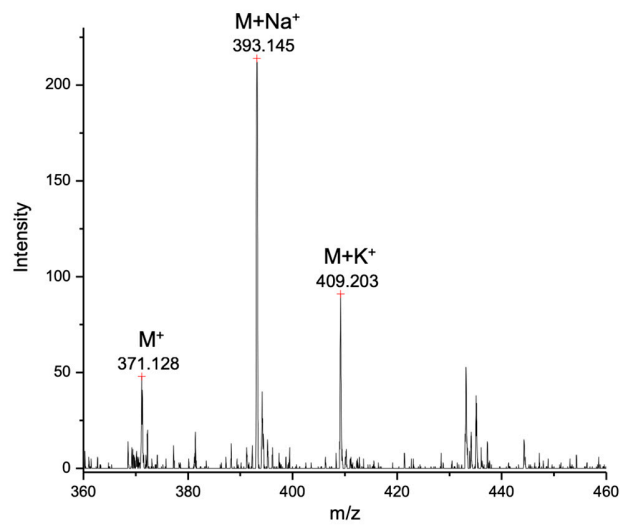

**Figure S3. MALDI-MS of compound 1.**

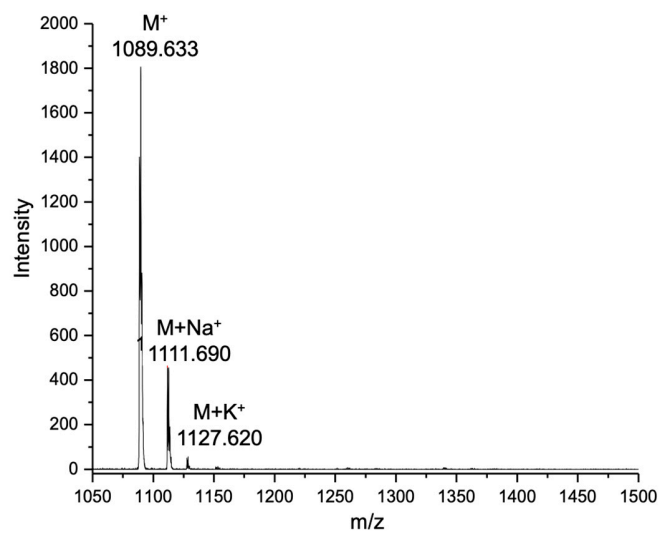

**Figure S4. MALDI-MS of compound 2.**

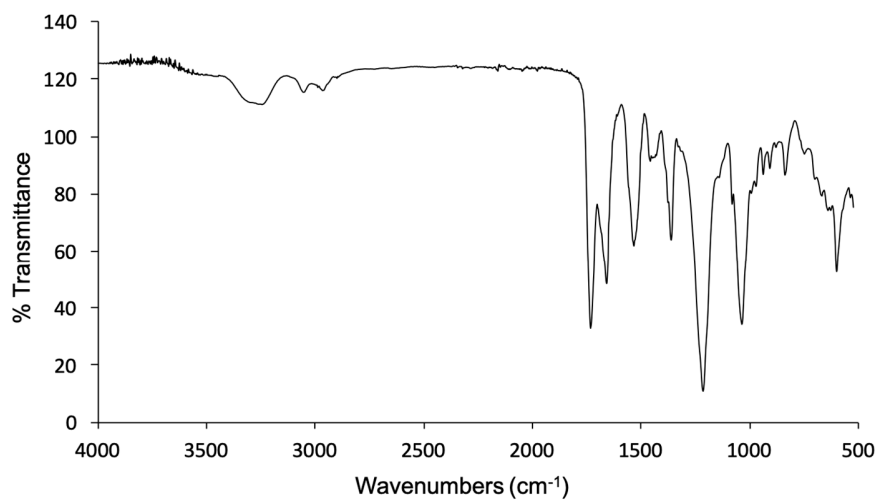

**Figure S5. IR of compound 3.**

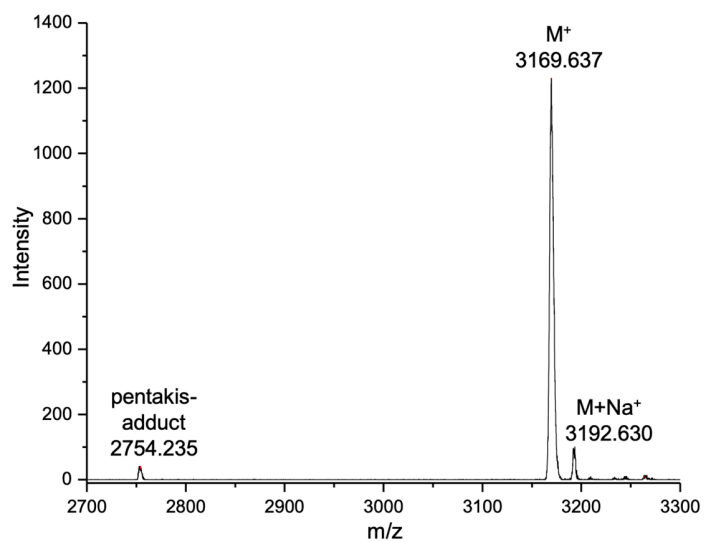

**Figure S6. MALDI-MS of compound 3.**

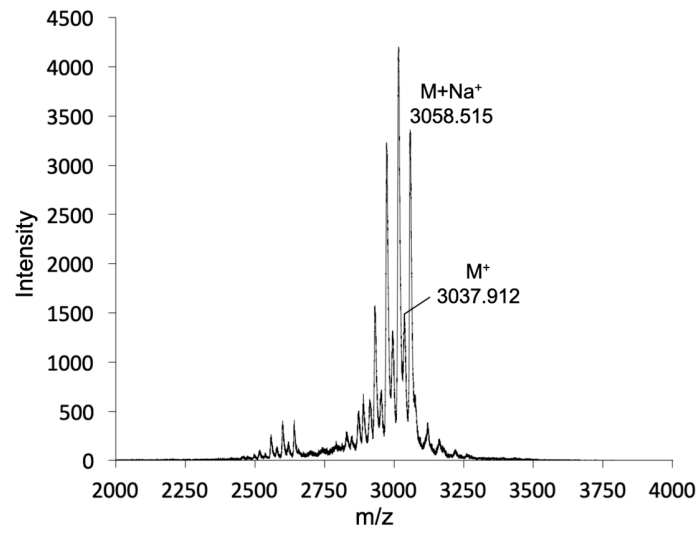

**Figure S7. MALDI-MS of compound 4.**

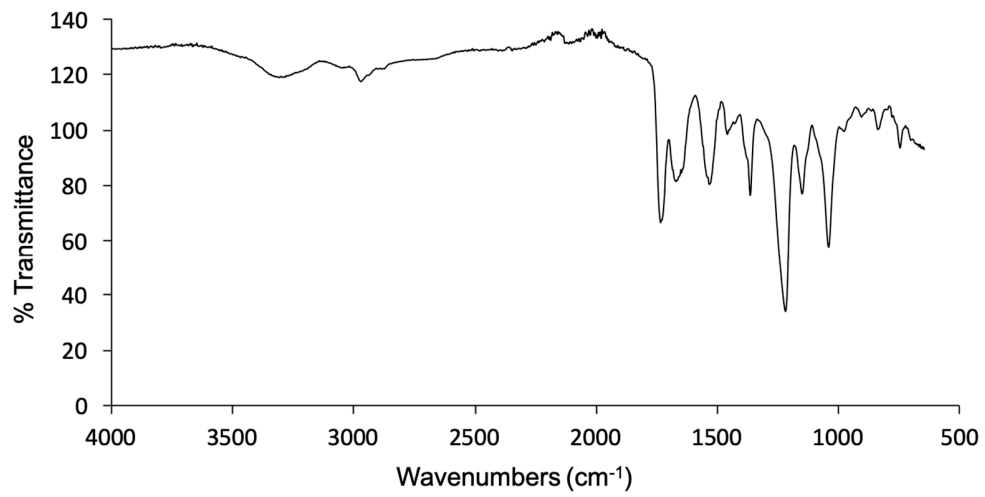

**Figure S8. IR of compound 5.**

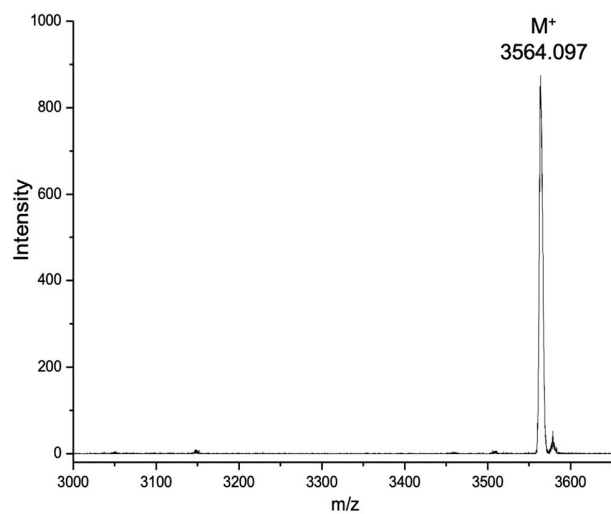

**Figure S9. MALDI-MS of compound 5.**

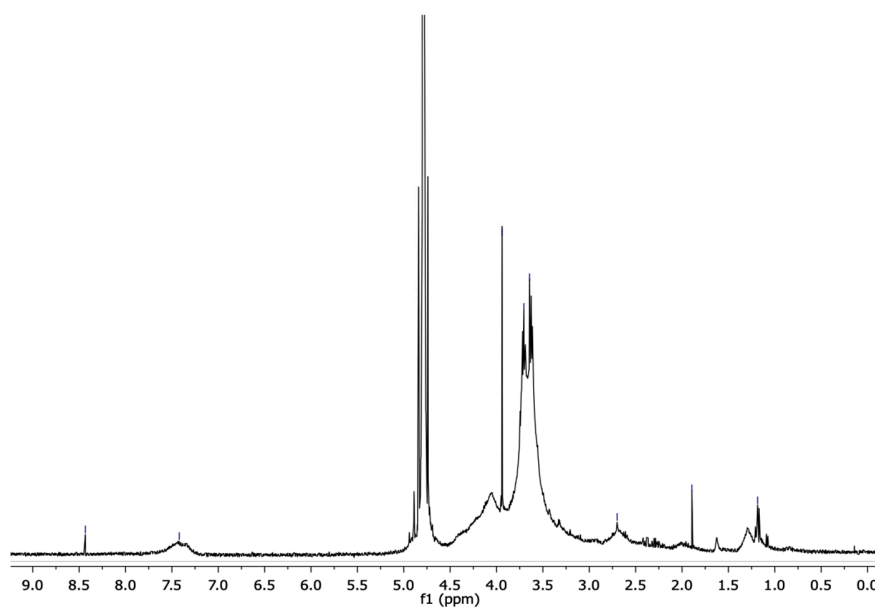

**Figure S10. <sup>1</sup>H NMR of compound 6.**

## 2. Characterization data for C<sub>60</sub>-NOTA conjugate and C<sub>60</sub>-[<sup>64</sup>Cu]Cu(NOTA)

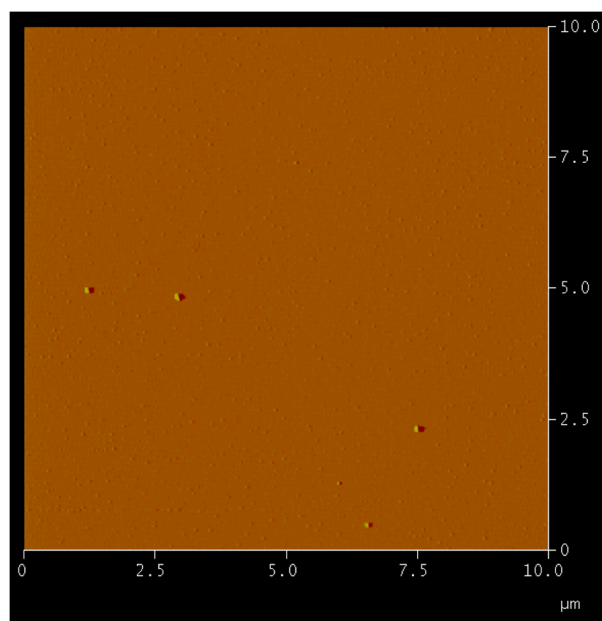

**Figure S11. AFM of C<sub>60</sub>-NOTA.** Average horizontal distance of three pictured nanoparticles is 195 nm and average vertical distance of three pictured nanoparticles is 0.122 nm.

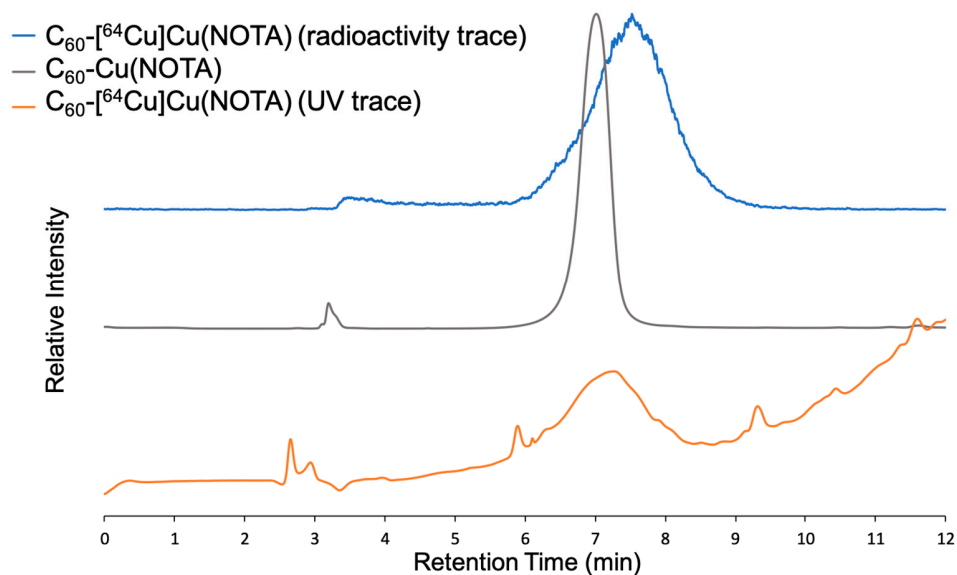

**Figure S12. Characterization of C<sub>60</sub>-[<sup>64</sup>Cu]Cu(NOTA).** Radio-HPLC trace of C<sub>60</sub>-[<sup>64</sup>Cu]Cu(NOTA) (blue, top), HPLC trace of C<sub>60</sub>-Cu(NOTA) at 254 nm (gray, middle), and HPLC trace of C<sub>60</sub>-[<sup>64</sup>Cu]Cu(NOTA) at 254 nm (orange, bottom).

### 3. C<sub>60</sub>-[<sup>64</sup>Cu]Cu(NOTA) stability test data

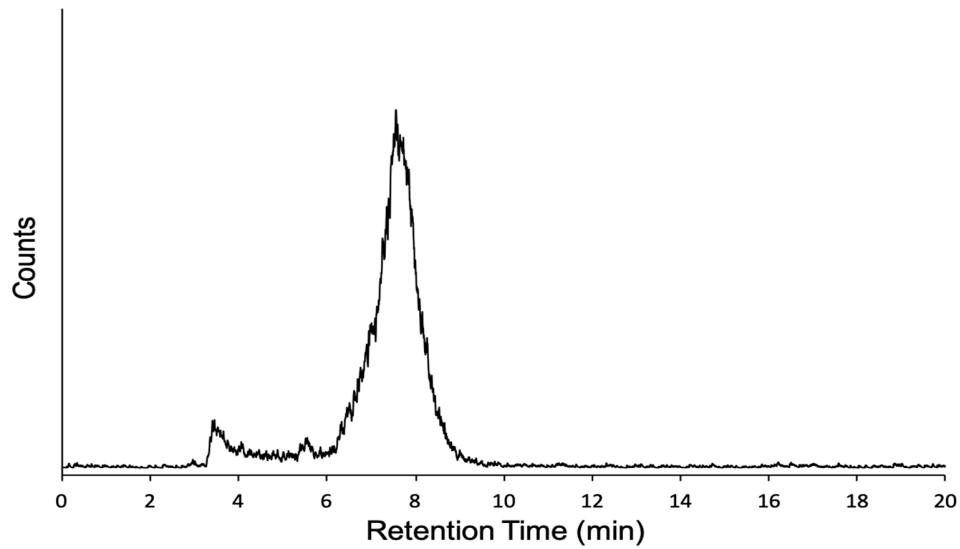

**Figure S13. Shelf stability study.** Radio-HPLC trace of C<sub>60</sub>-[<sup>64</sup>Cu]Cu(NOTA) after incubation in 1x PBS for 48 hours at room temperature.

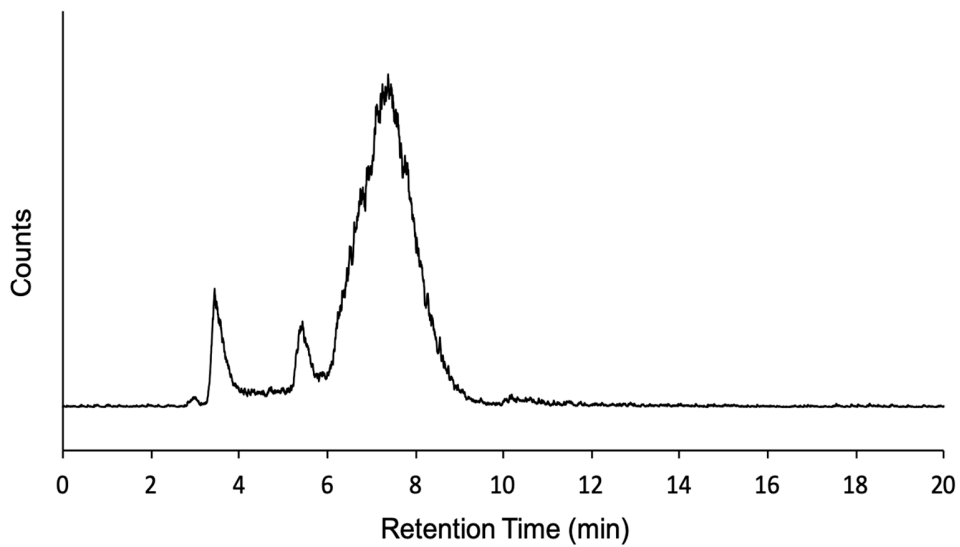

**Figure S14. Shelf stability study.** Radio-HPLC trace of C<sub>60</sub>-[<sup>64</sup>Cu]Cu(NOTA) after incubation in human serum for 48 hours at 37 °C.
